# Supplementary material
Source: Springer Nature journal article supplement (https://www.springermedizin.de/resource/supplementary/12883_2014_1048_MOESM2_ESM.pdf/9456436)

# Person-Item Threshold Distribution

(Grouping Set to Interval Length of 0,20 making 95 Groups)

PERSONS

INFORMATION

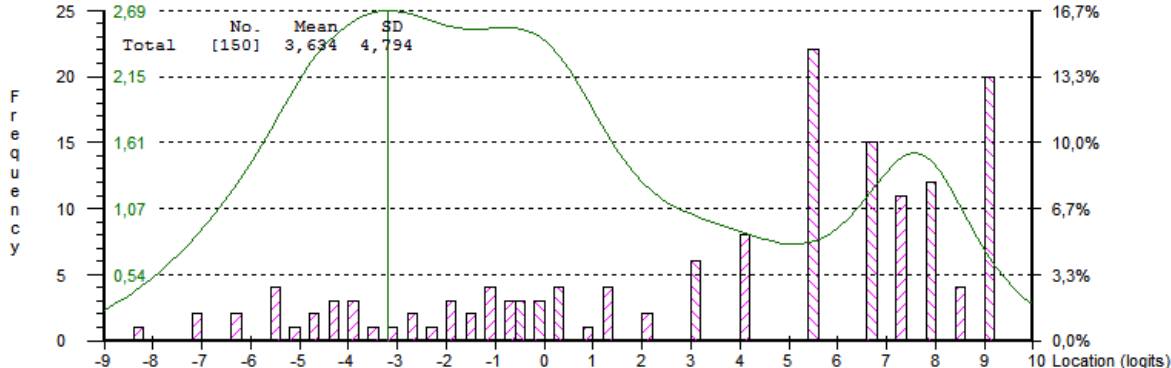

ITEMS

Frequency

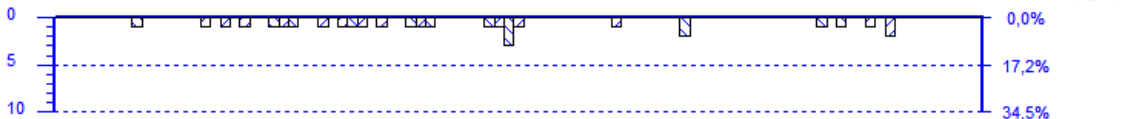

Supplement: MOESM2 [file 9456436]
